# Supplementary material for: Synthesis, structure, and electrochemical properties of [LNi(Rf)(C4F8)]− and [LNi(Rf)3]− complexes
Source: Royal Society of Chemistry journal article supplement (doi:10.1039/d2dt00511e), 2022-01-01
Supplement: d2dt00511e1.pdf [file d2dt00511e1.pdf]

Electronic Supporting Information (ESI)  
for  
Synthesis, Structure, and Electrochemical Properties of [LNi(R<sub>f</sub>)(C<sub>4</sub>F<sub>8</sub>)]<sup>-</sup> and  
[LNi(R<sub>f</sub>)<sub>3</sub>]<sup>-</sup> Complexes

Scott T. Shreiber,<sup>#a</sup> Fatema Amin,<sup>#a</sup> Sascha A. Schäfer,<sup>b</sup> Roger E. Cramer,<sup>c</sup> Axel Klein <sup>b\*</sup> and David A. Vici<sup>a\*</sup>

<sup>a</sup> Department of Chemistry, Lehigh University, 6 E Packer Ave., Bethlehem, PA 18015, USA. Email: sts217@lehigh.edu; ORCID: 0000-0002-4224-7461 (S.T.S); E-mail: fab319@lehigh.edu; ORCID: 0000-0002-8420-1912 (F.A.).

<sup>b</sup> University of Cologne, Faculty of Mathematics and Natural Sciences, Department of Chemistry, Institute for Inorganic Chemistry, Greinstrasse 6, 50939 Koeln, Germany. E-mail: sascha.schaefer@uni-koeln.de; ORCID: 0000-0003-0093-9619 (S.A.S.).

<sup>c</sup> Department of Chemistry, University of Hawaii, 2545 McCarthy Mall, Honolulu, HI, 96822, USA. E-mail: rcramer@hawaii.edu ORCID: 0000-0002-3934-3401 (R.E.C.).

<sup>#</sup>These authors contributed equally to this work.

\* Corresponding authors: E-mail: axel.klein@uni-koeln.de, ORCID: 0000-0003-0093-9619; Tel.: +49-221-470-4006 (A.K.). E-mail: vici@lehigh.edu; fax, 1-610-758-6536, ORCID: 0000-0002-4990-0355 (D.A.V.)

**Contents:**

**Fig. S1** Views on the crystals structure of **2**.

**Fig. S2.** Views on the crystal structure of **3**.

**Fig. S3** Preliminary X-ray data for compound **4-pentane-2benzene**.

**Fig. S4.** Views on the crystal structure of **6**.

**Fig. S5** ORTEP diagram of **6'·MeCN** = [PPh<sub>4</sub>][Ni(IMes)(CF<sub>3</sub>)<sub>3</sub>]·MeCN.

**Fig. S6** ORTEP diagrams of **6'·MeCN** = [PPh<sub>4</sub>][Ni(IMes)(CF<sub>3</sub>)<sub>3</sub>]·MeCN.

**Fig. S7** ORTEP diagrams of **7** and **7'**.

**Fig. S8** Views on the crystal structure of **7**.

**Fig. S9** ORTEP diagrams of **9** and **9'**.

**Fig. S10** ORTEP diagram of **9''**.

**Fig. S11** Views on the crystal structure of **9**.

**Fig. S12** Views on the crystal structure of [PNP]<sub>2</sub>[Ni<sub>2</sub>(CF<sub>3</sub>)<sub>4</sub>(μ-F)<sub>2</sub>] and ORTEP diagram.

**Fig. S13** 400 MHz <sup>1</sup>H NMR spectrum of **2** in CD<sub>3</sub>CN.

**Fig. S14** 376 MHz <sup>19</sup>F NMR spectrum of **2** in CD<sub>3</sub>CN.

**Fig. S15** 400 MHz <sup>1</sup>H NMR spectrum of **3** in CD<sub>3</sub>CN.

**Fig. S16** 376 MHz <sup>19</sup>F NMR spectrum of **3** in CD<sub>3</sub>CN.

**Fig. S17** 400 MHz <sup>1</sup>H NMR spectrum of **4** in CD<sub>3</sub>CN.

**Fig. S18** 376 MHz <sup>19</sup>F NMR spectrum of **4** in CD<sub>3</sub>CN.

**Fig. S19** 400 MHz <sup>1</sup>H NMR spectrum of **6** in CD<sub>3</sub>CN.

**Fig. S20** 376 MHz <sup>19</sup>F NMR spectrum of **6** in CD<sub>3</sub>CN.

**Fig. S21** 400 MHz <sup>1</sup>H NMR and 470.6 MHz <sup>19</sup>F NMR spectra of **7** and **7'** in CD<sub>3</sub>CN.

**Fig. S22** 400 MHz <sup>1</sup>H NMR and 470.6 MHz <sup>19</sup>F NMR spectra of **8** and **8'** in CD<sub>3</sub>CN.

Fig. S23 400 MHz  $^1\text{H}$  NMR and 470.6 MHz  $^{19}\text{F}$  NMR spectra of **9** and **9'** in  $\text{CD}_3\text{CN}$ .

Fig. S24 Cyclic voltammograms of **1**, **2**, and **4** in  $\text{MeCN}/n\text{-Bu}_4\text{NPF}_6$ .

Fig. S25 Cyclic voltammograms of **5** and **6** in  $\text{MeCN}/n\text{-Bu}_4\text{NPF}_6$ .

Fig. S26 Cyclic voltammograms of  $[\text{NEt}_4][(\text{IMes})\text{Ni}(\text{CF}_3)_3]$  (**6**) and  $[\text{NEt}_4][(2,4\text{-F}_2\text{Ph-NHC})\text{Ni}(\text{CF}_3)_3]$  (**7**).

Fig. S27 Cyclic voltammograms of  $[\text{NEt}_4][(2,4,6\text{-F}_3\text{Ph-NHC})\text{Ni}(\text{CF}_3)_3]$  (**8**) and  $[\text{NEt}_4][(3,4,5\text{-F}_3\text{Ph-NHC})\text{Ni}(\text{CF}_3)_3]$  (**9**).

Table S1. Selected structure solution and refinement data for nickel complexes **6'**, **7**, **9**, and **9'**.

Table S2 Selected structure solution and refinement data for  $[\text{PNP}]_2[\text{Ni}_2(\text{CF}_3)_4(\mu\text{-F})_2]\cdot 2\text{THF}$ .

### Supporting Figures

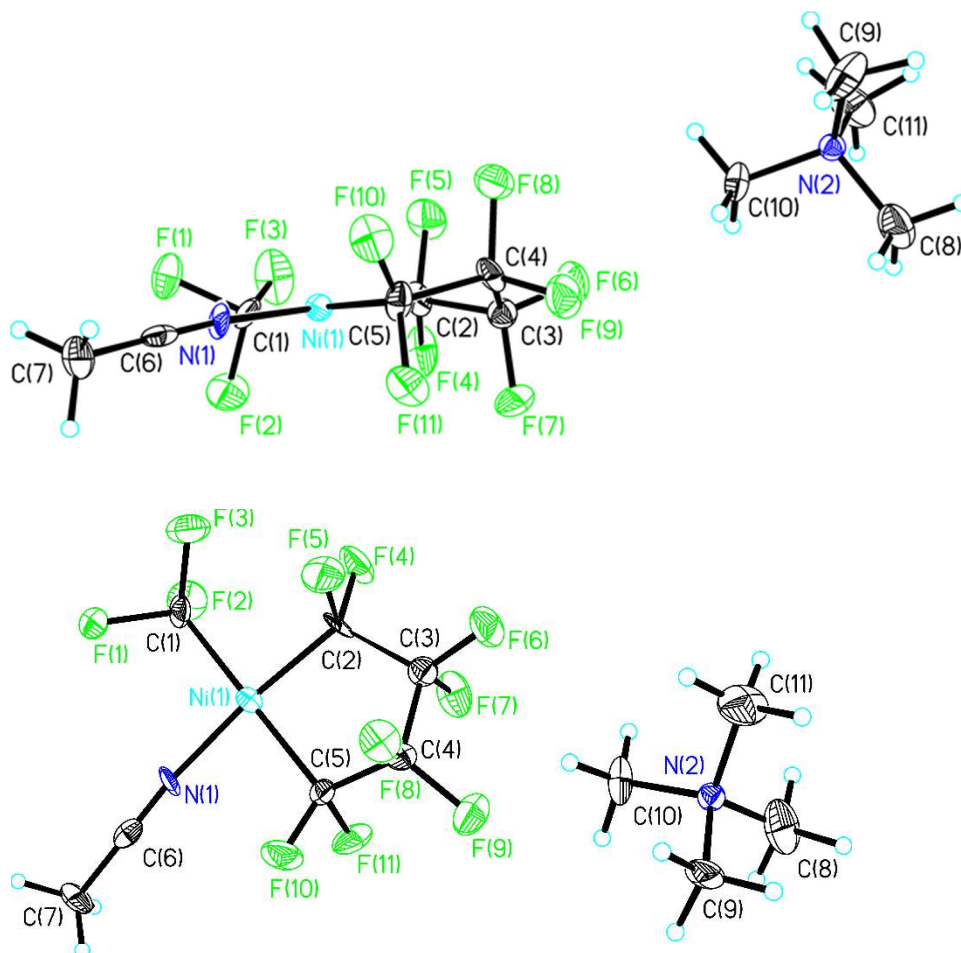

Fig. S1 Views on the crystals structure of **2**.

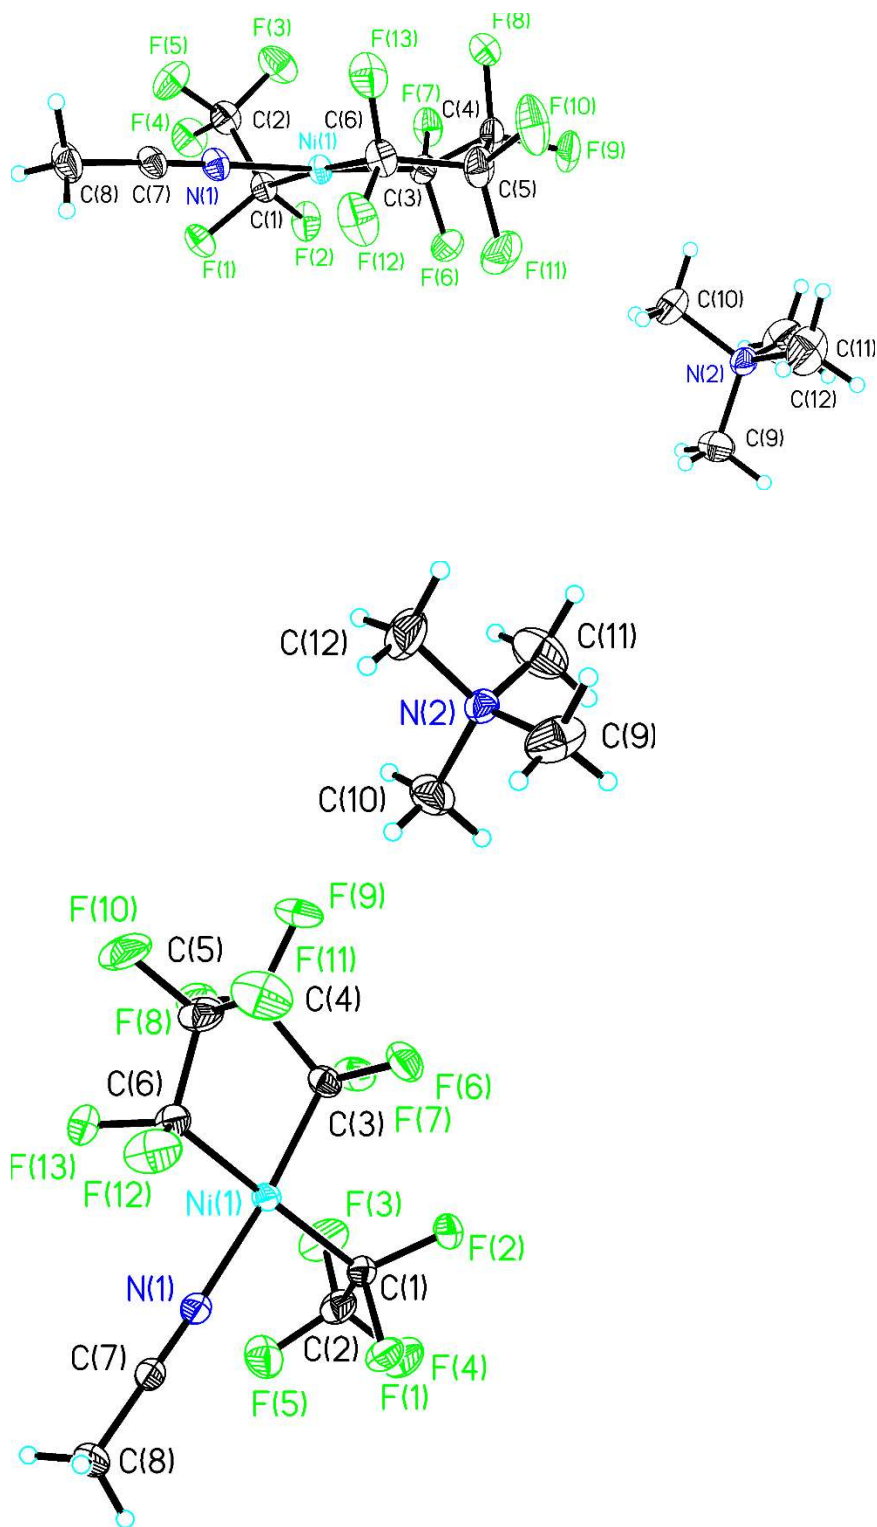

Fig. S2. Views on the crystal structure of 3.

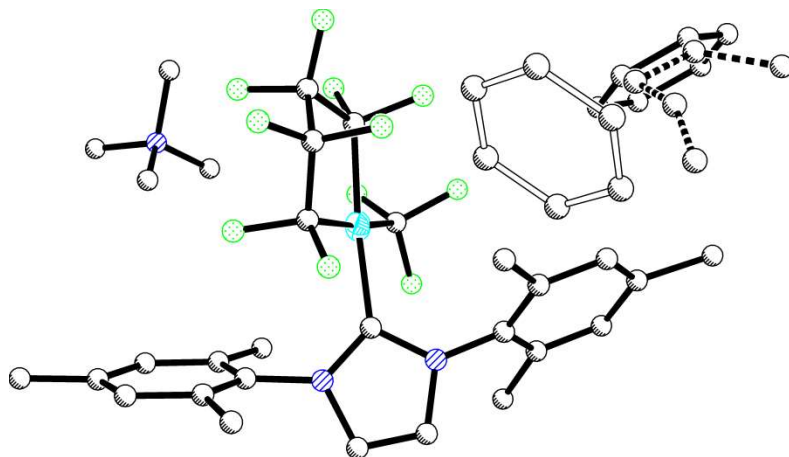

**Fig. S3** Preliminary X-ray data for compound **4-pentane-2-benzene**. Only a poorly refined data set with two co-crystallized benzene molecules and one co-crystallized pentane could be obtained for compound **4**. The preliminary structure shown here is only provided as additional support of the connectivity assignment in the text.

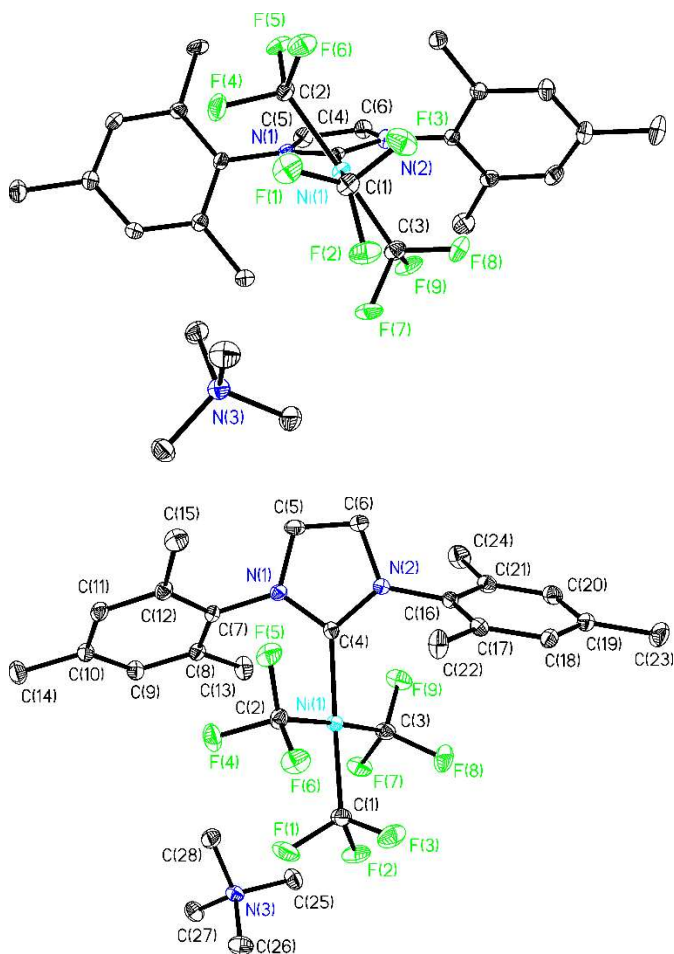

**Fig. S4.** Views on the crystal structure of **6**.

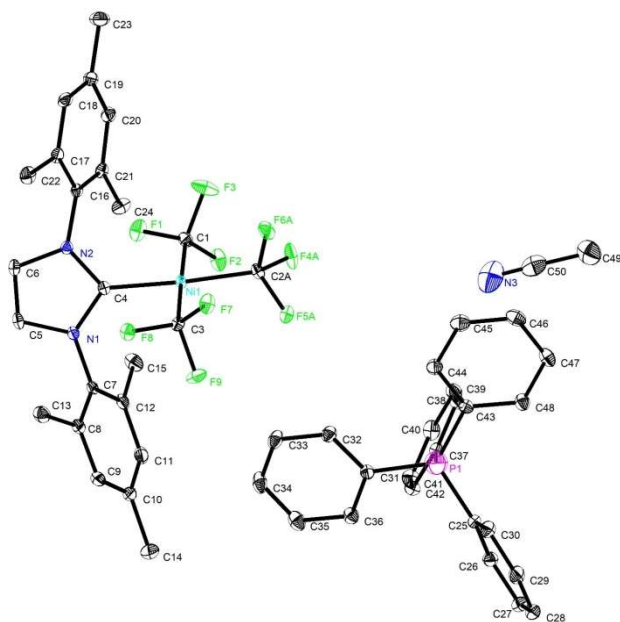

**Fig. S5** ORTEP diagram of  $6'\text{-MeCN} = [\text{PPh}_4][\text{Ni}(\text{IMes})(\text{CF}_3)_3]\cdot\text{MeCN}$ . Ellipsoids shown at the 40% level. Hydrogen atoms as well as a positional disorder of C2 are omitted for clarity.

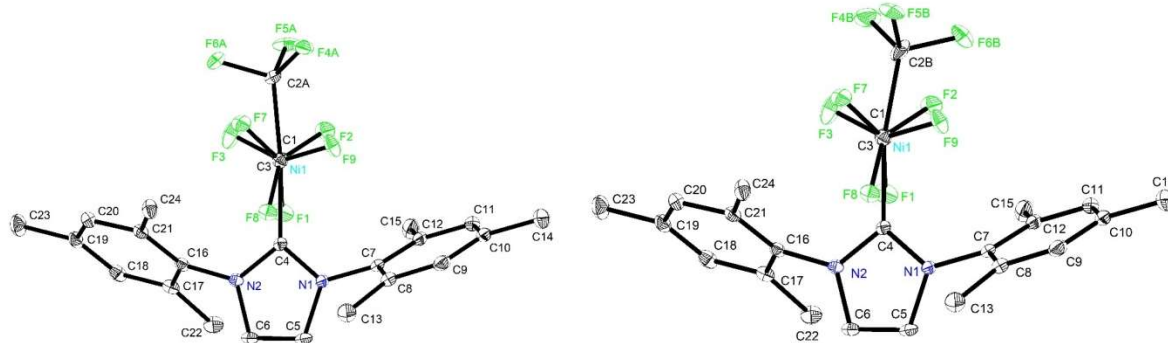

**Fig. S6** ORTEP diagrams of  $6'\text{-MeCN} = [\text{PPh}_4][\text{Ni}(\text{IMes})(\text{CF}_3)_3]\cdot\text{MeCN}$ . Ellipsoids shown at the 40% level. Hydrogen atoms, co-crystallized solvent and counter cations are omitted for clarity. The left structure shows the major species with a chemical occupancy of 83.2% and a C4–Ni1–C2A bond angle of  $174.23^\circ$ . The right structure is the minor species with a chemical occupancy of 16.8% and C4–Ni1–C2B bond angle of  $169.0^\circ$ .

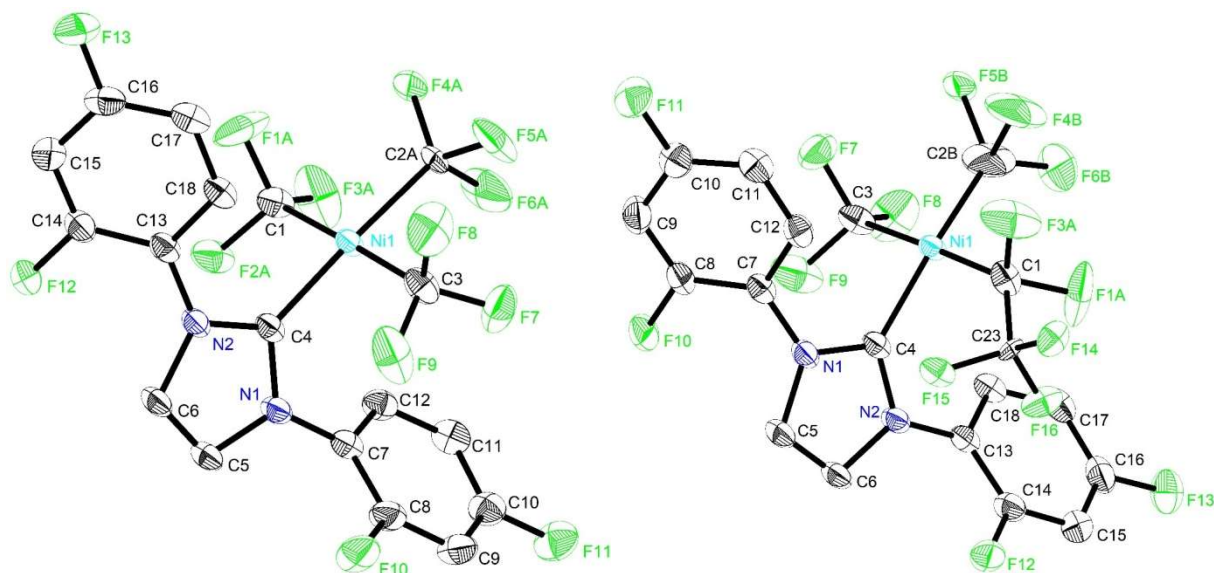

**Fig. S7** ORTEP diagrams of **7** (left) and **7'** (right). Ellipsoids shown at the 40% level. Hydrogen atoms and counter cations are omitted for clarity. Both structures were generated from the same XRD measurement. Compound **7'** is present with a chemical occupancy of 12.5%. The right diagram additionally shows the split position of carbon C2A/C2B, with the respective bond angles for C2A–Ni1–C4 176.33(15)° and C2B–Ni1–C4 173.8(9)°. C2B shows a chemical occupancy of 26.3(6)%. Besides the shown partial placement of a C<sub>2</sub>F<sub>5</sub> along C1 a rotational disorder of the CF<sub>3</sub> function centered on C1 is observed with a chemical occupancy of 22.9(6)%, and is omitted from the diagrams for clarity.

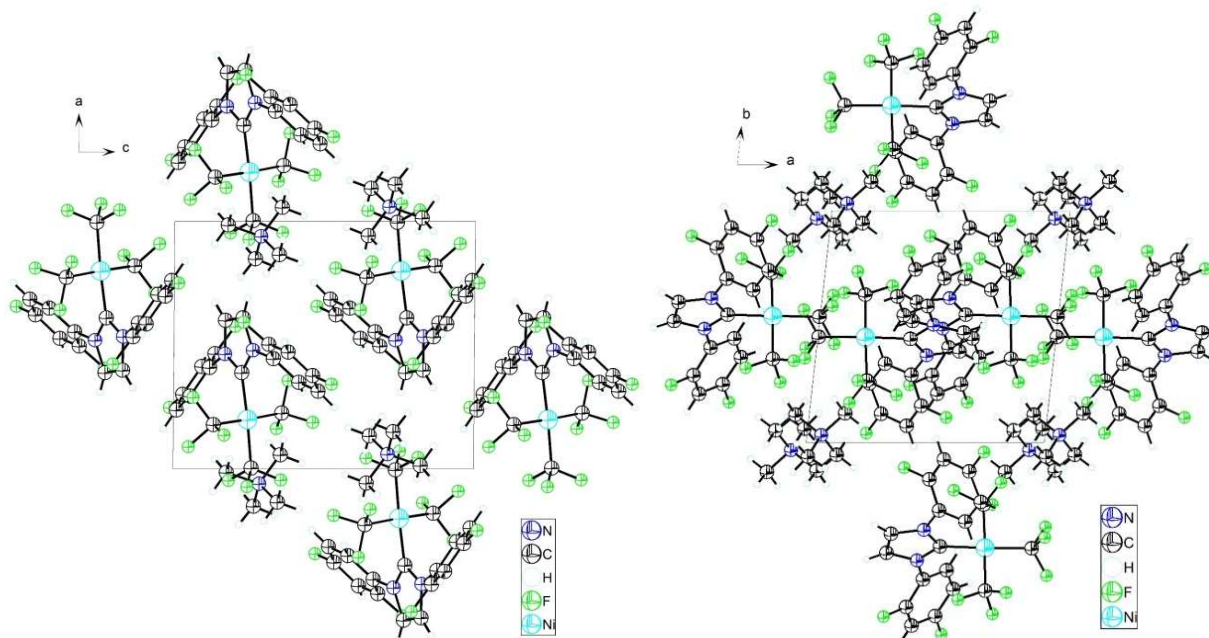

**Fig. S8** View on the crystal structure of **7**, shown along the crystallographic *b* and *c* axis.

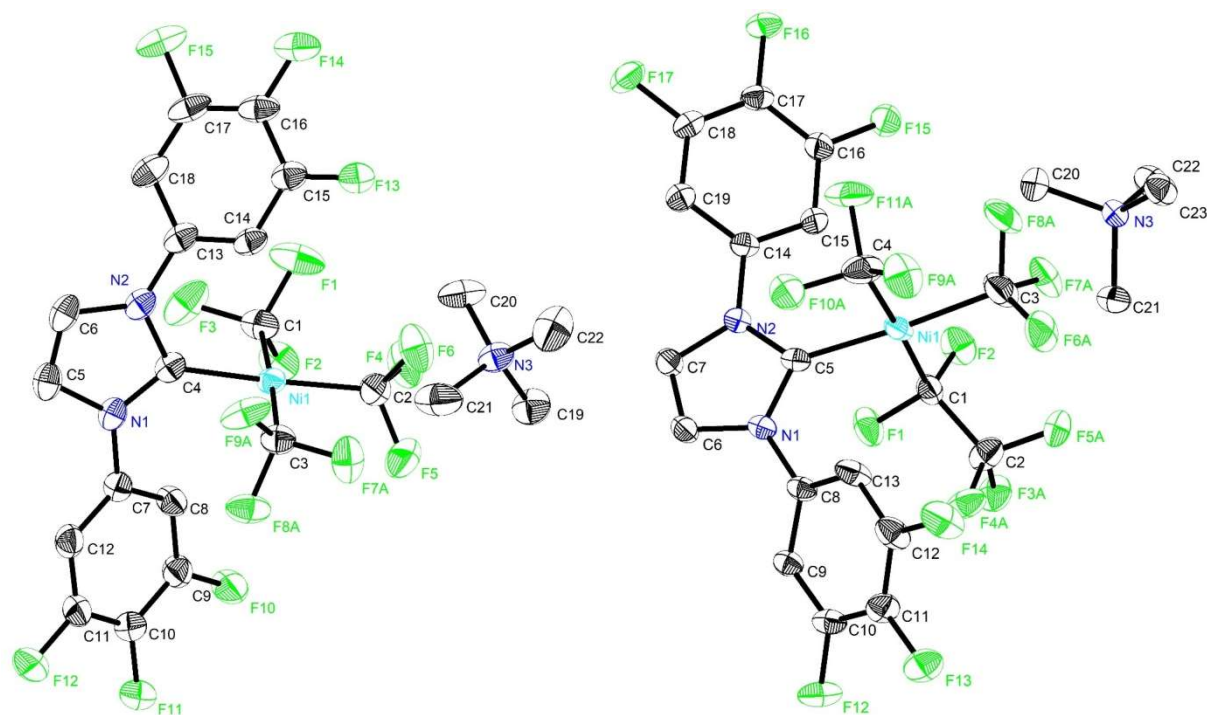

**Fig. S9** ORTEP diagrams of **9** (left) and **9'** (right). Ellipsoids shown at the 40% level. Hydrogen atoms are omitted for clarity. In the structure of **9'** 2 equivalents of THF are omitted for clarity. In contrast to compound **7** / **7'** these two compounds crystallized separately and were measured independently. Both structures show rotational disorder of  $\text{CF}_3$  functions. Compound **9'** additionally shows a  $\text{C4}-\text{CF}_3-\text{C}_2\text{F}_5$  disorder on C4, where one F atom is exchanged for an additional  $\text{CF}_3$  function with a chemical occupancy of 20%.

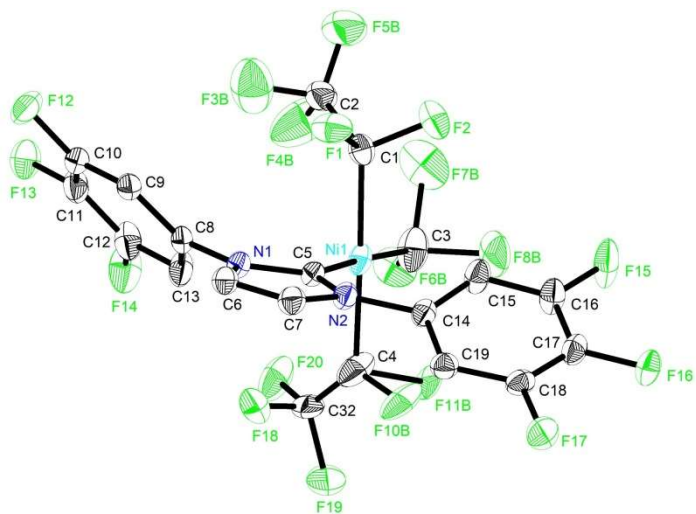

**Fig. S10** ORTEP diagram of **9''**, the minor species (20%) found in a crystal of **9'**, showing both the rotational and chemical disorder. Ellipsoids shown at the 40% level. Hydrogen atoms, co-crystallized THF and counter cation are omitted for clarity.

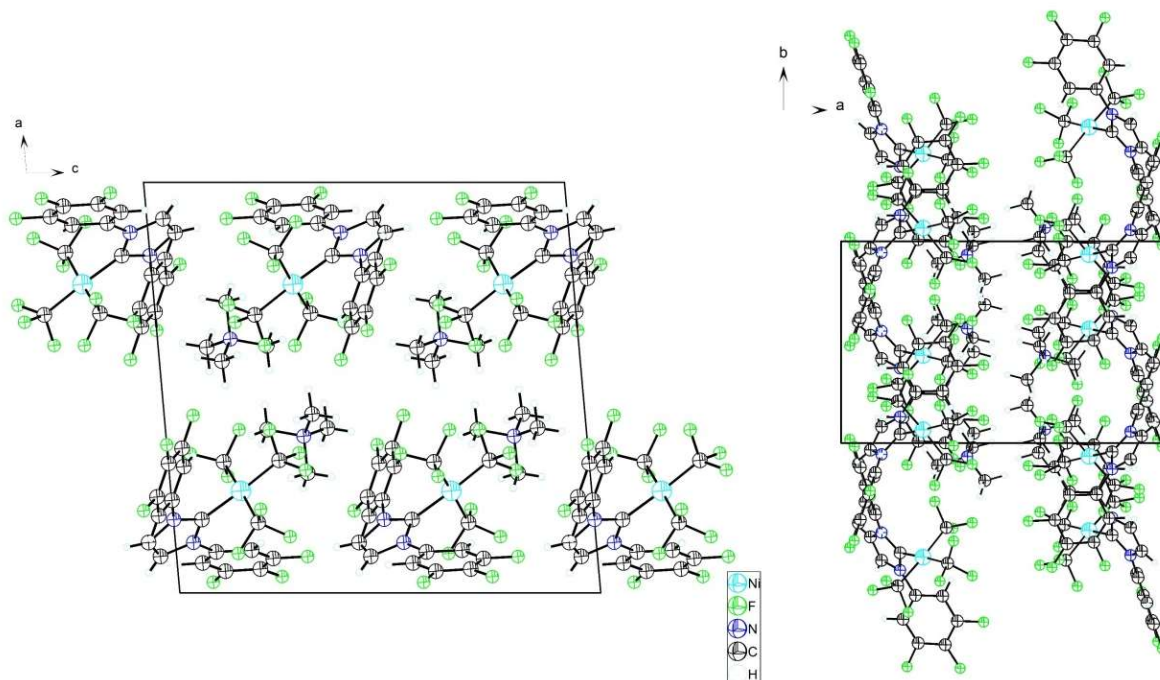

**Fig. S11** Views on the crystal structure of **9** along the crystallographic *b* and *c* axis.

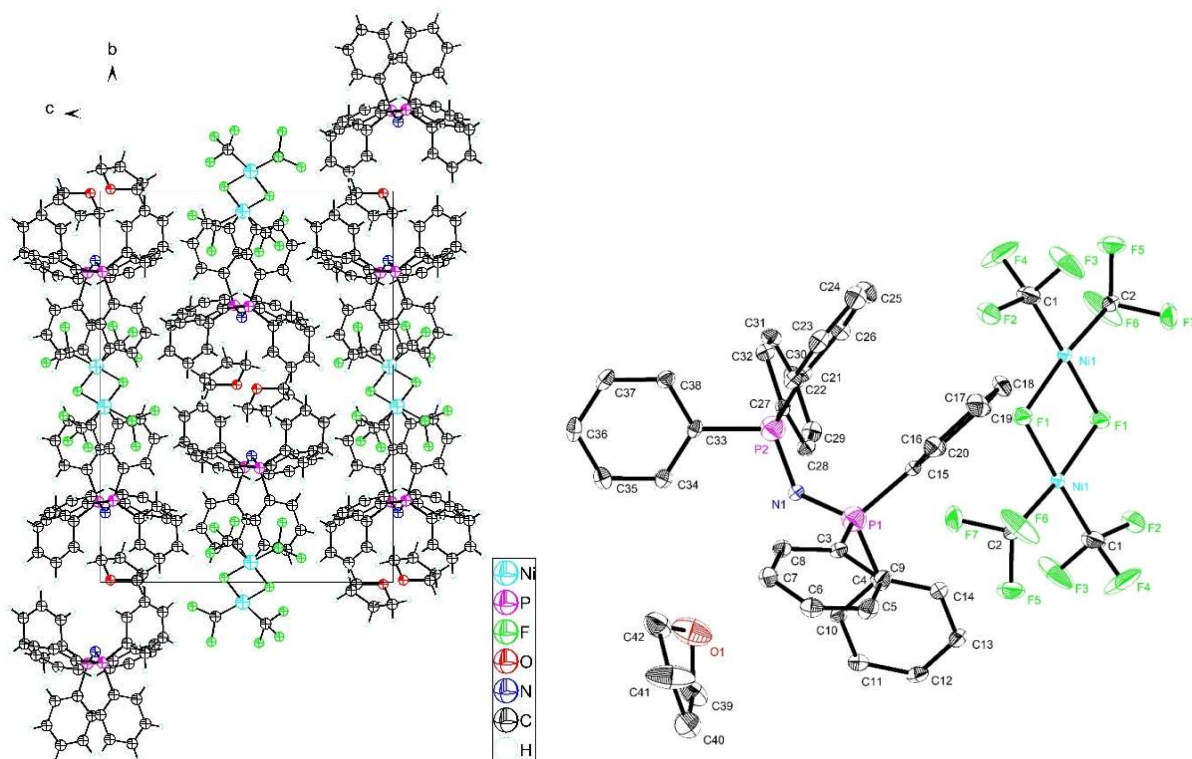

**Fig. S12** View on the crystal structure of  $[\text{PNP}]_2[\text{Ni}_2(\text{CF}_3)_4(\mu\text{-F})_2] \cdot 2\text{THF}$  along the crystallographic *a* axis (left) and ORTEP diagram of  $[\text{Ni}_2(\text{CF}_3)_4(\mu\text{-F})_2]$  (right). Ellipsoids shown at the 40% level. Hydrogen atoms, as well as one molecule each of  $[\text{PNP}]^+$  and THF molecules are omitted for clarity.



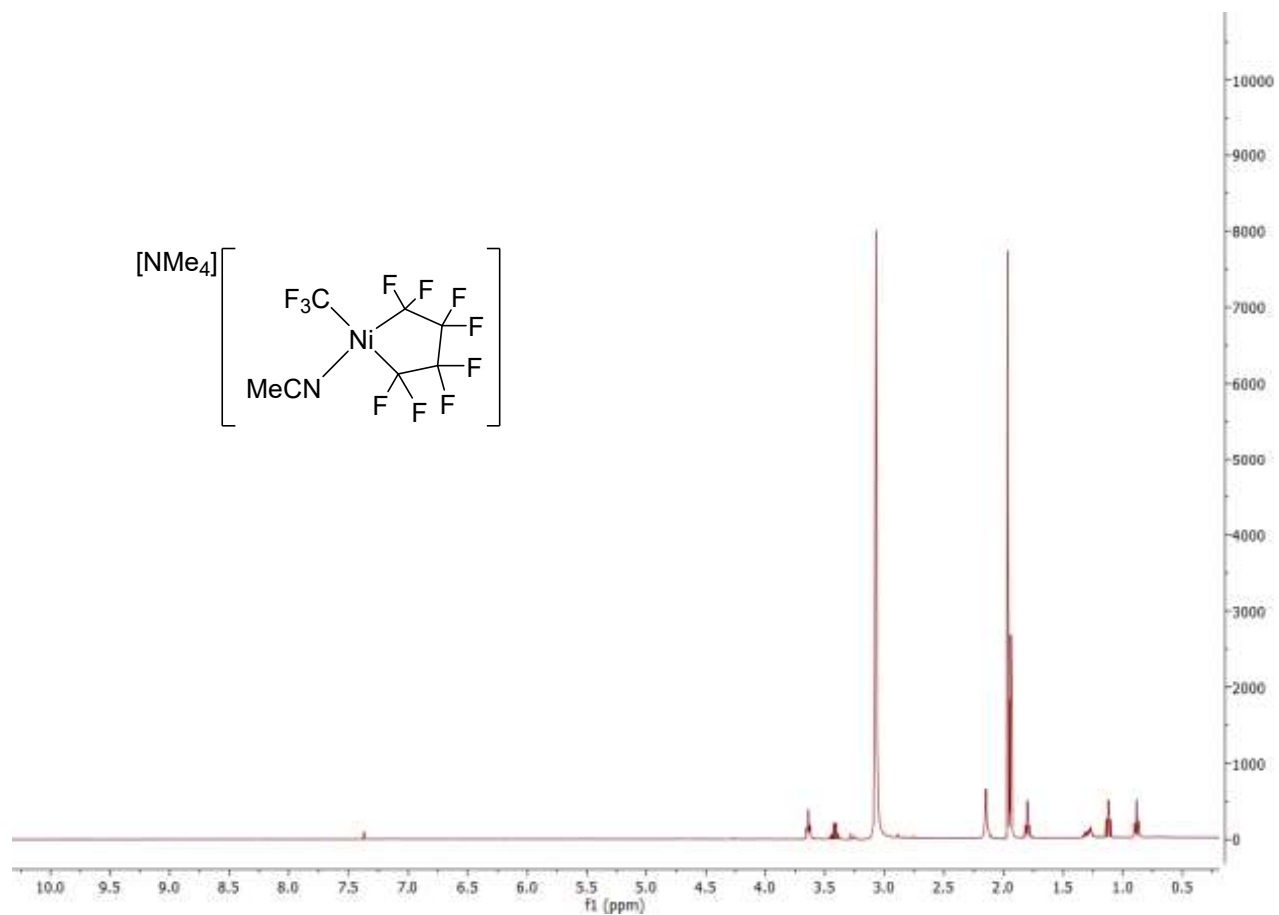

**Fig. S13**  $^1\text{H}$  NMR spectrum of  $[\text{NMe}_4][(\text{MeCN})(\text{CF}_3)\text{Ni}(\text{C}_4\text{F}_8)]$  (2) in  $\text{CD}_3\text{CN}$

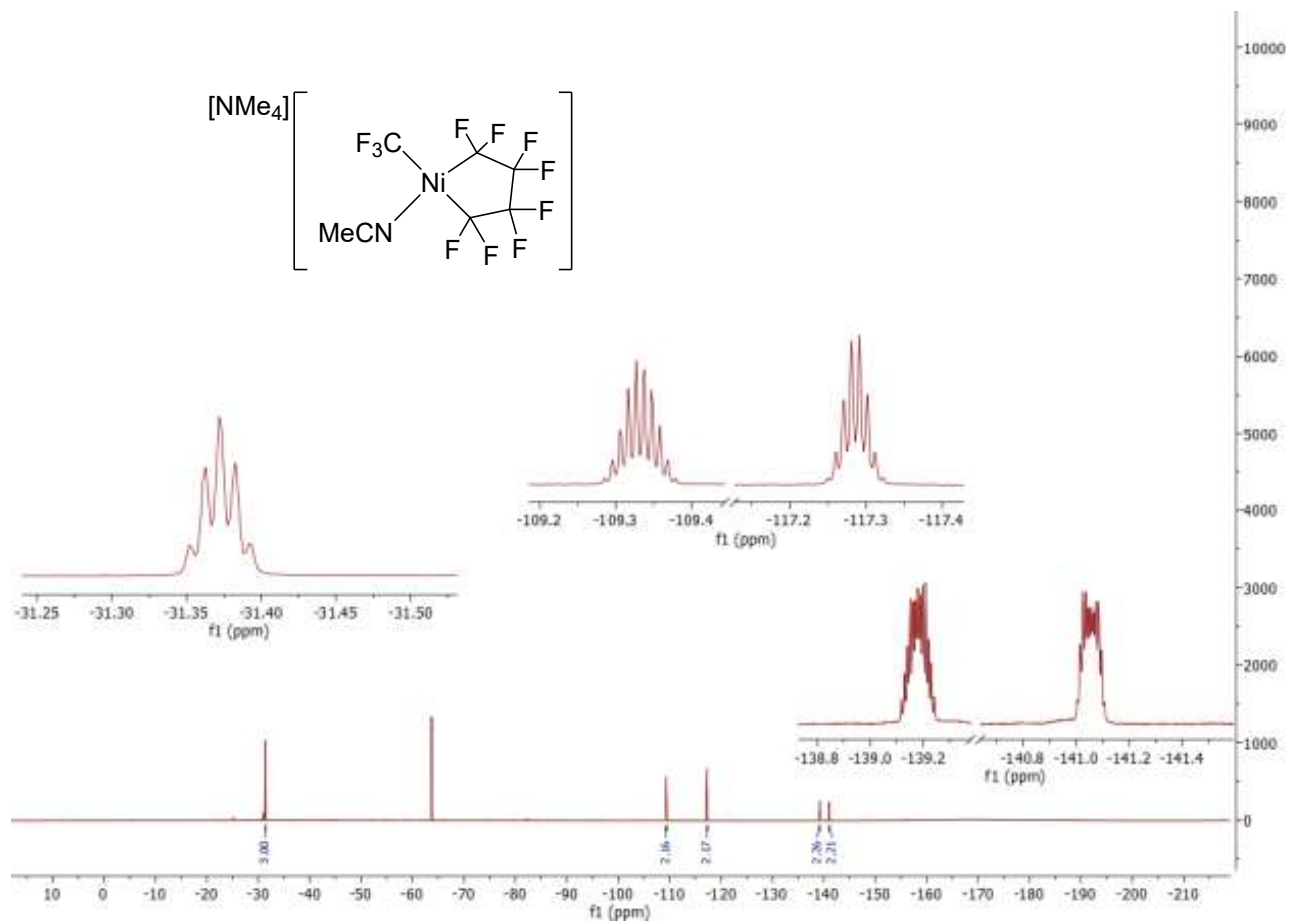

**Fig. S14** 376 MHz  $^{19}\text{F}$  NMR spectrum of **2** in  $\text{CD}_3\text{CN}$ .

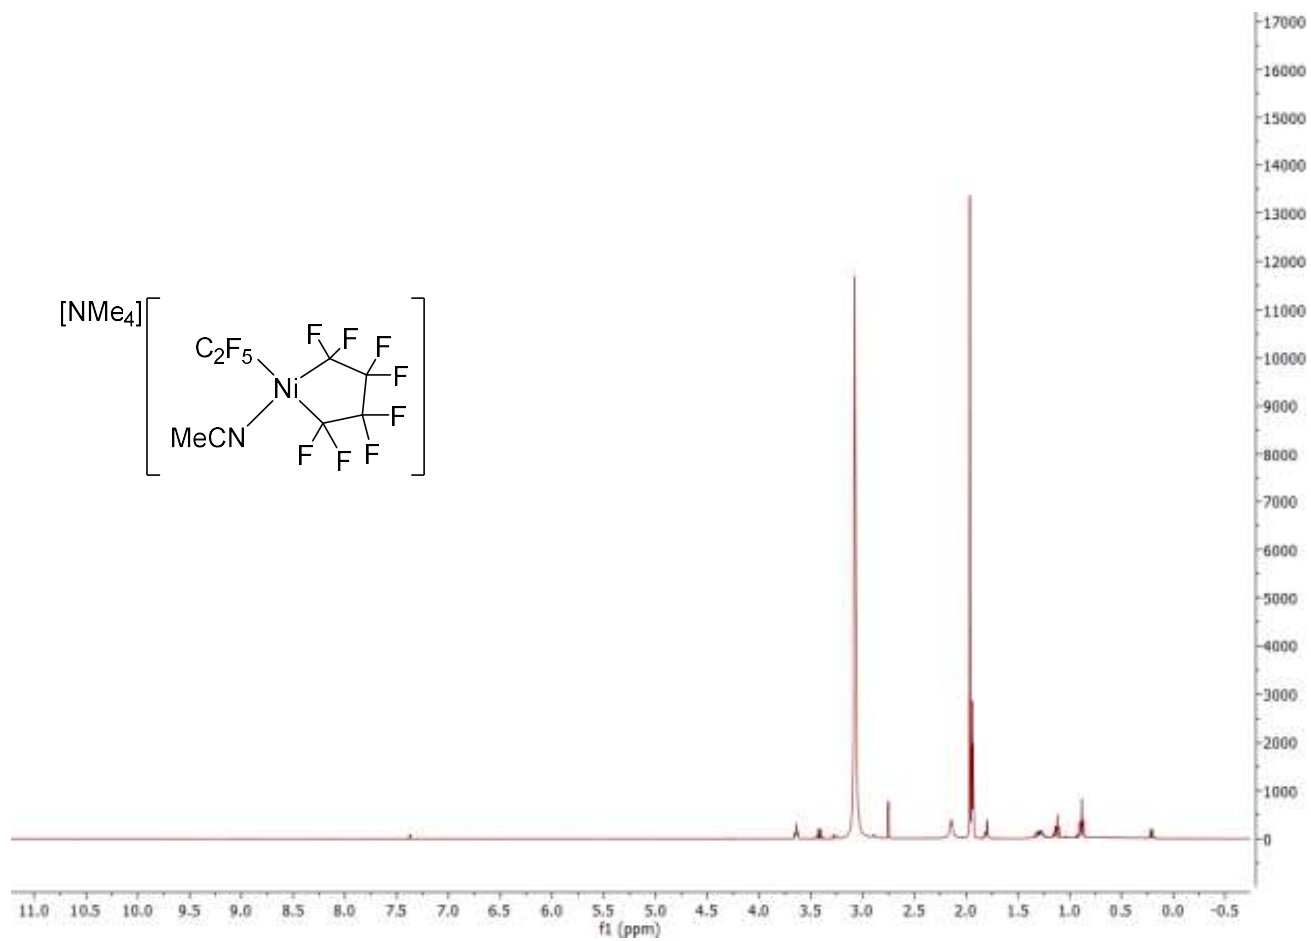

**Fig. S15** <sup>1</sup>H NMR of [NMe<sub>4</sub>][(MeCN)(C<sub>2</sub>F<sub>5</sub>)Ni(C<sub>4</sub>F<sub>8</sub>)] (3) in CD<sub>3</sub>CN.

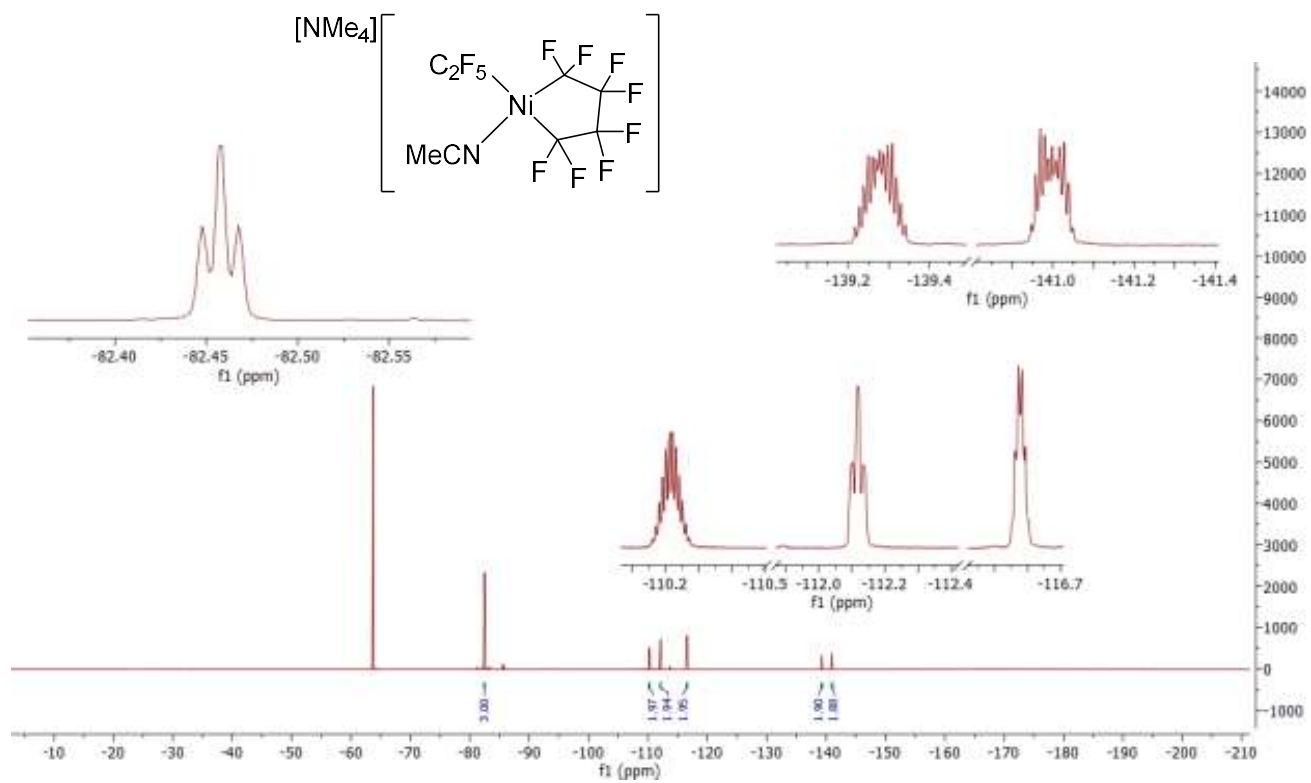

**Fig. S16** 376 MHz  $^{19}\text{F}$  NMR spectra of **3** in  $\text{CD}_3\text{CN}$ .

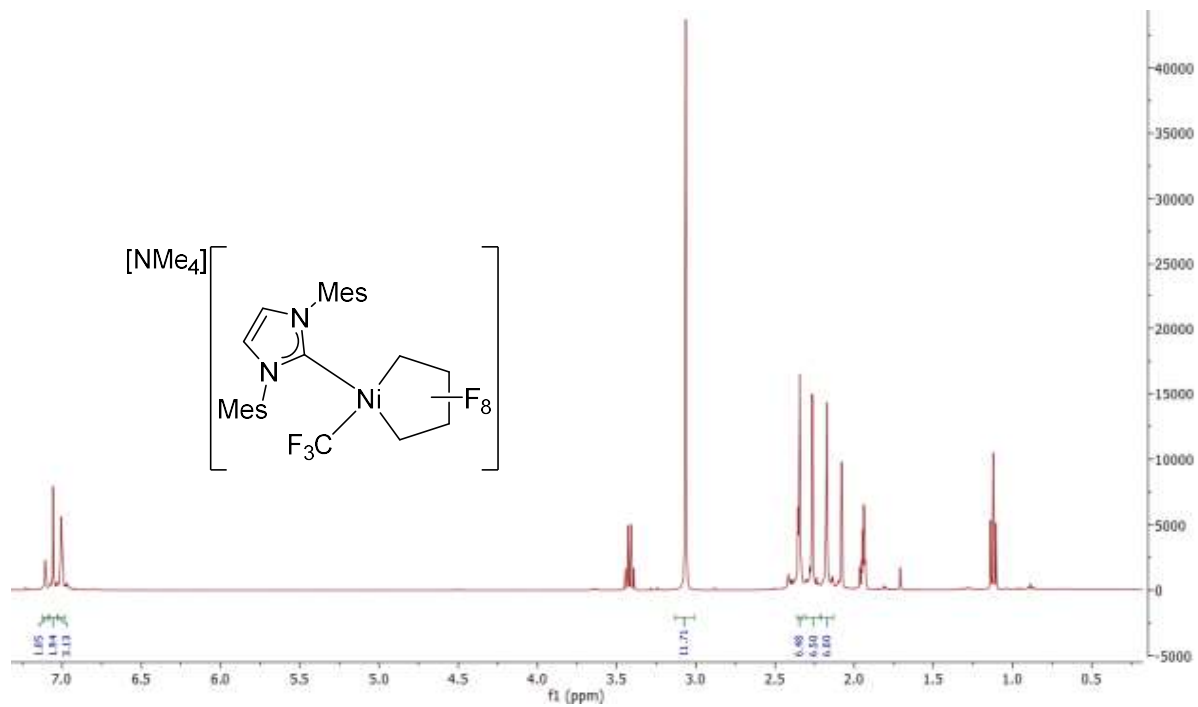

Fig. S17 400 MHz  $^1\text{H}$  NMR spectrum of **4** in  $\text{CD}_3\text{CN}$ .

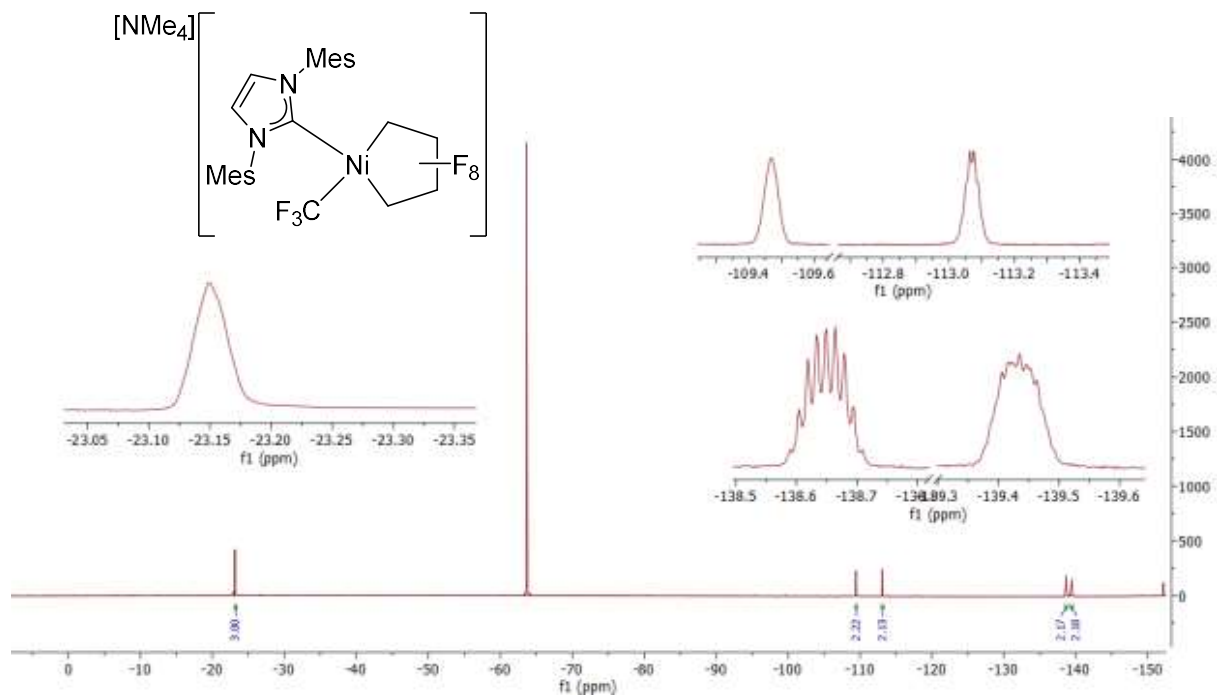

**Fig. S18** 376 MHz  $^{19}\text{F}$  NMR spectrum of **4** in  $\text{CD}_3\text{CN}$ .

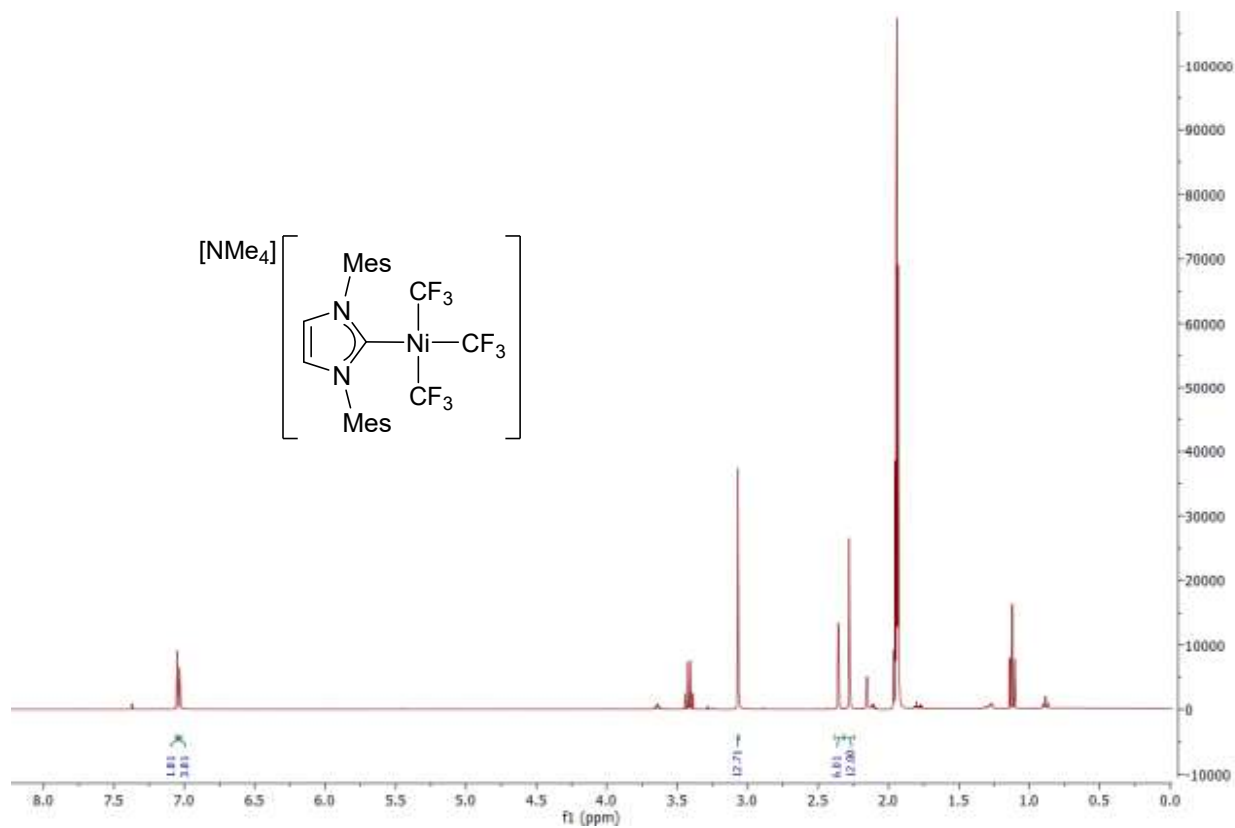

Fig. S19 400 MHz  $^1\text{H}$  NMR spectrum of **6** in  $\text{CD}_3\text{CN}$ .

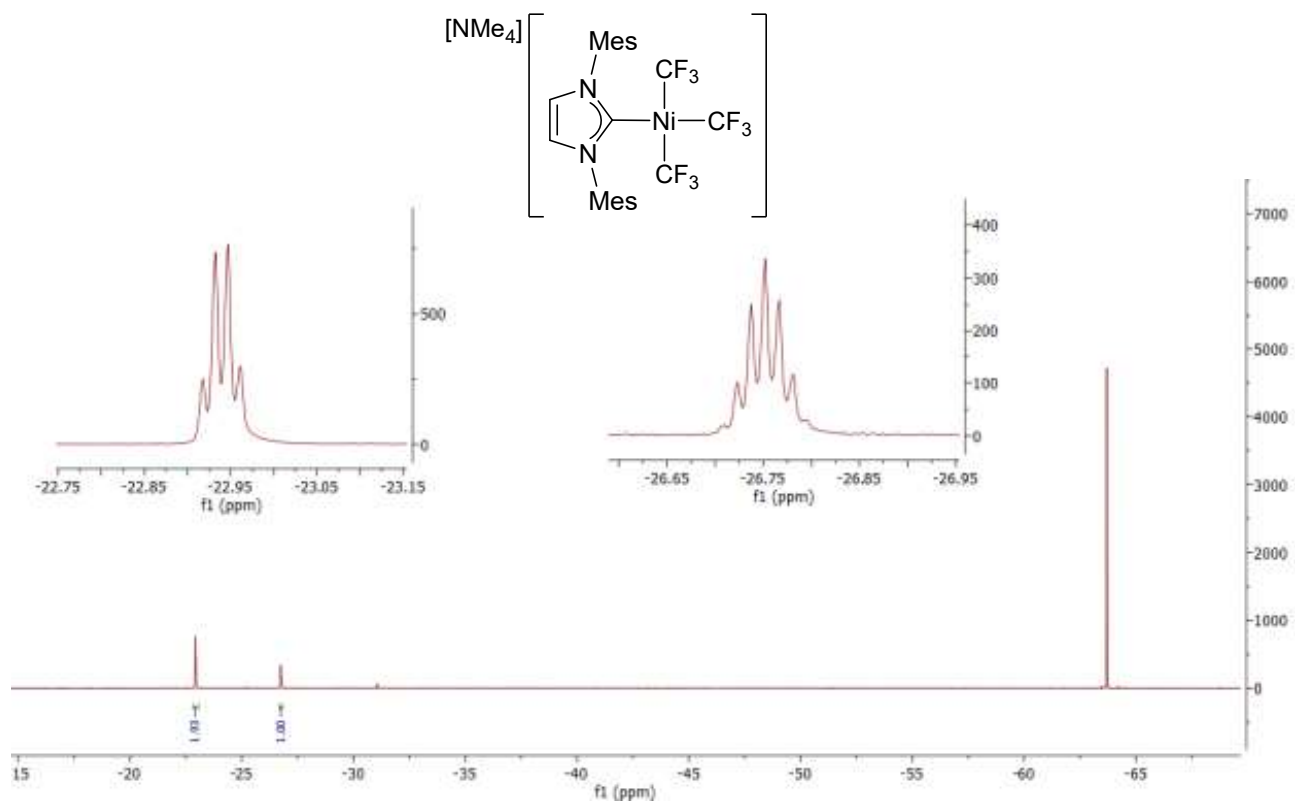

Fig. S20 376 MHz  $^{19}\text{F}$  NMR spectrum of **6** in  $\text{CD}_3\text{CN}$ .

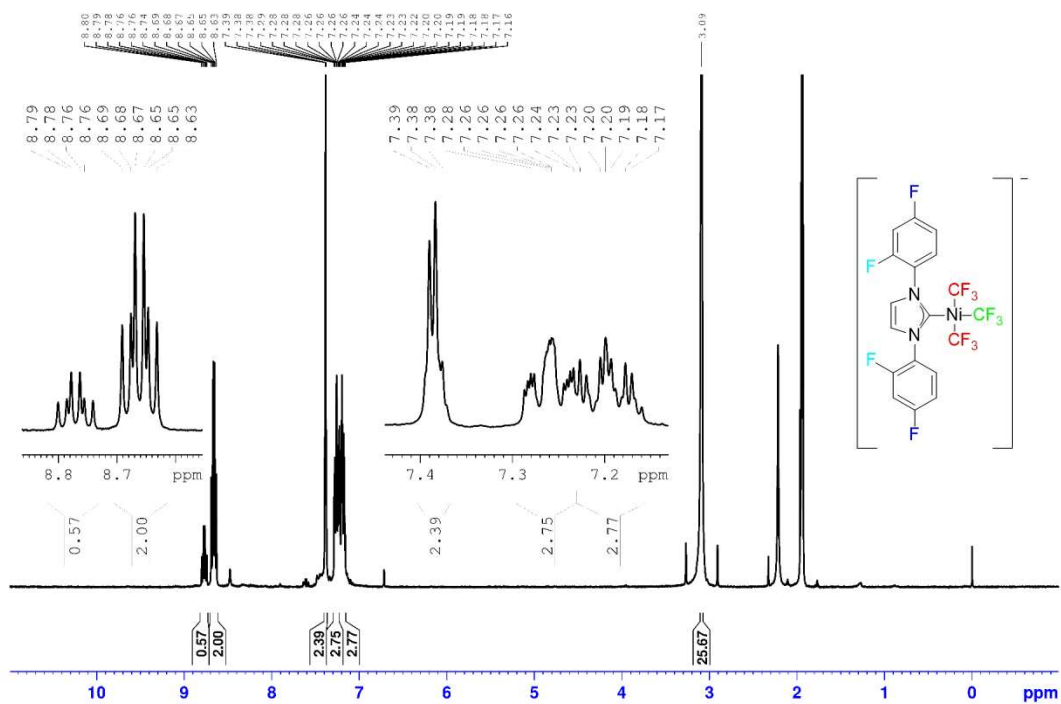

Fig. S21A 400 MHz  $^1\text{H}$  NMR and 470.6 MHz  $^{19}\text{F}$  NMR spectra of **7** and **7'** in  $\text{CD}_3\text{CN}$ .



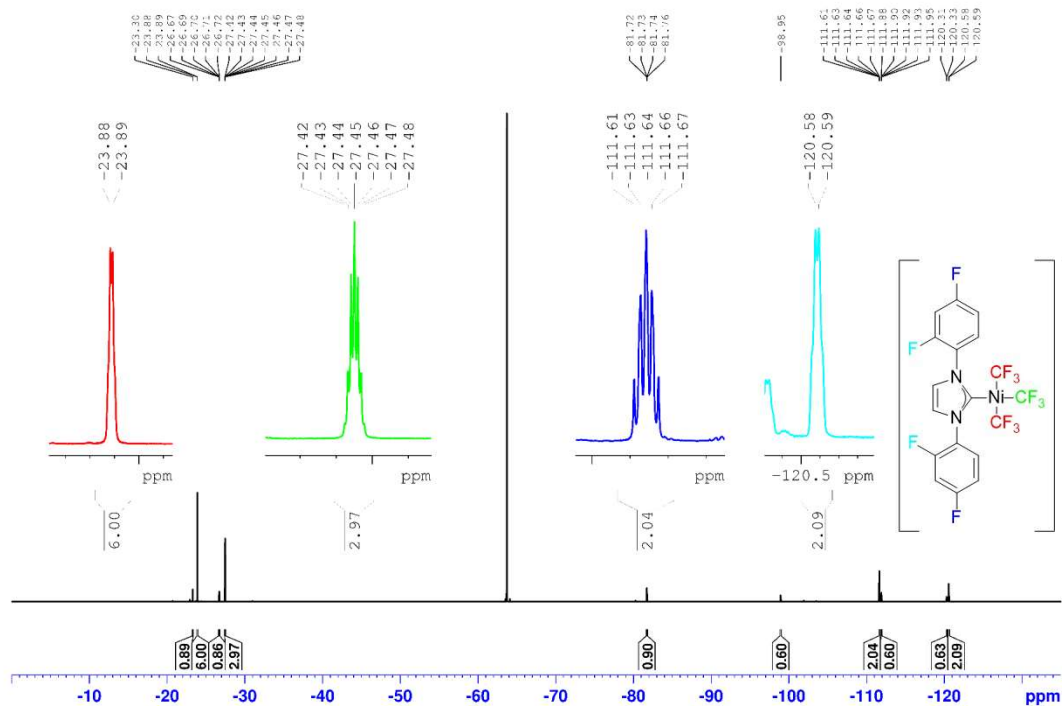

Fig. S21B 400 MHz  $^1\text{H}$  NMR and 470.6 MHz  $^{19}\text{F}$  NMR spectra of **7** and **7'** in  $\text{CD}_3\text{CN}$ .

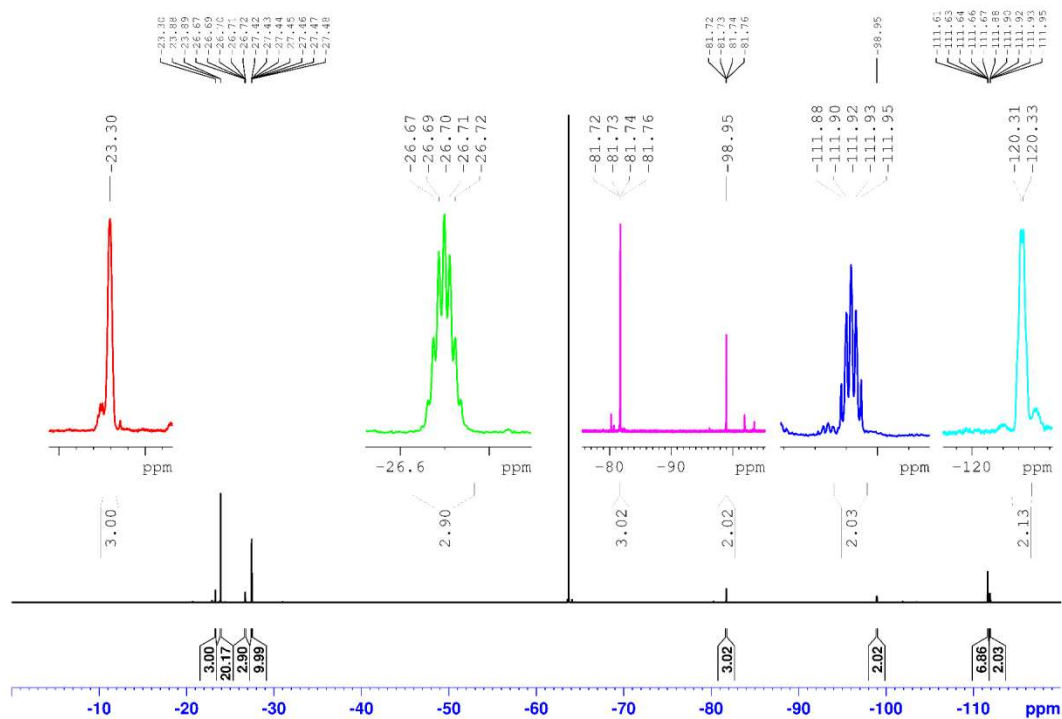

Fig. S21C 400 MHz  $^1\text{H}$  NMR and 470.6 MHz  $^{19}\text{F}$  NMR spectra of **7** and **7'** in  $\text{CD}_3\text{CN}$ .

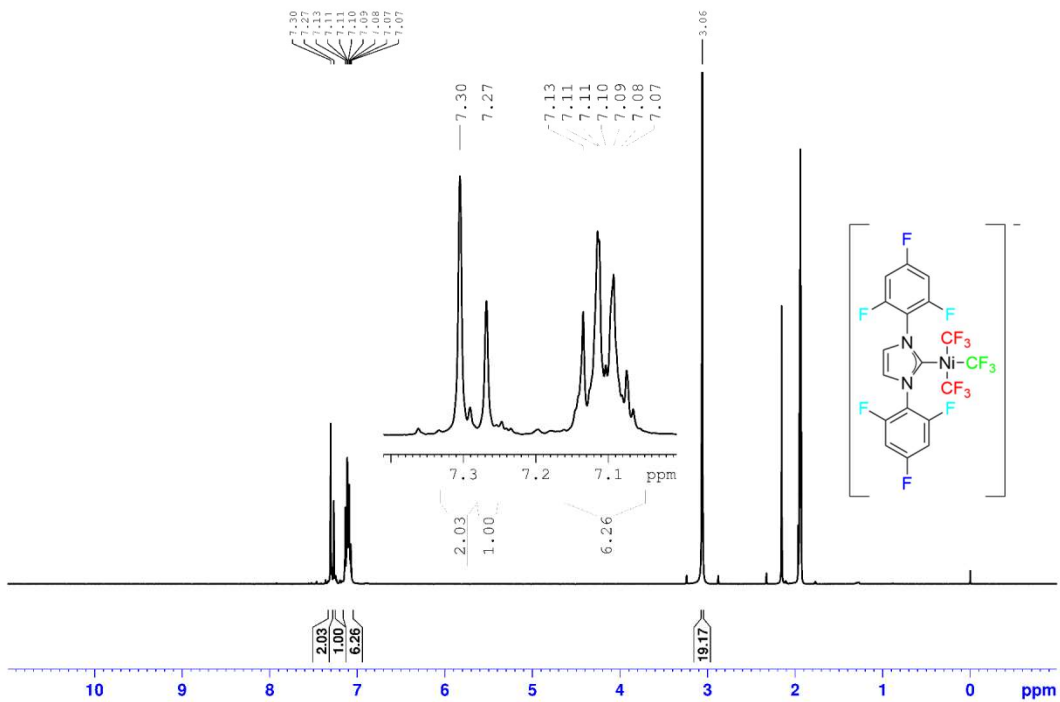

Fig. S22A 400 MHz <sup>1</sup>H NMR and 470.6 MHz <sup>19</sup>F NMR spectra of **8** and **8'** in CD<sub>3</sub>CN.

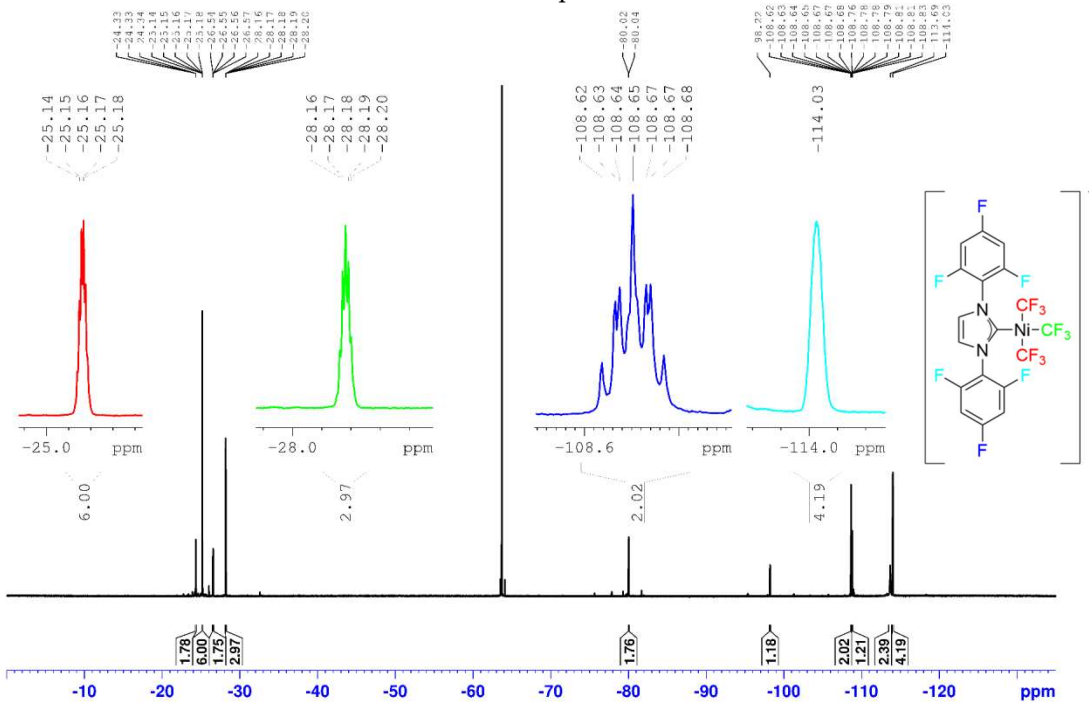

Fig. S22B 400 MHz <sup>1</sup>H NMR and 470.6 MHz <sup>19</sup>F NMR spectra of **8** and **8'** in CD<sub>3</sub>CN.



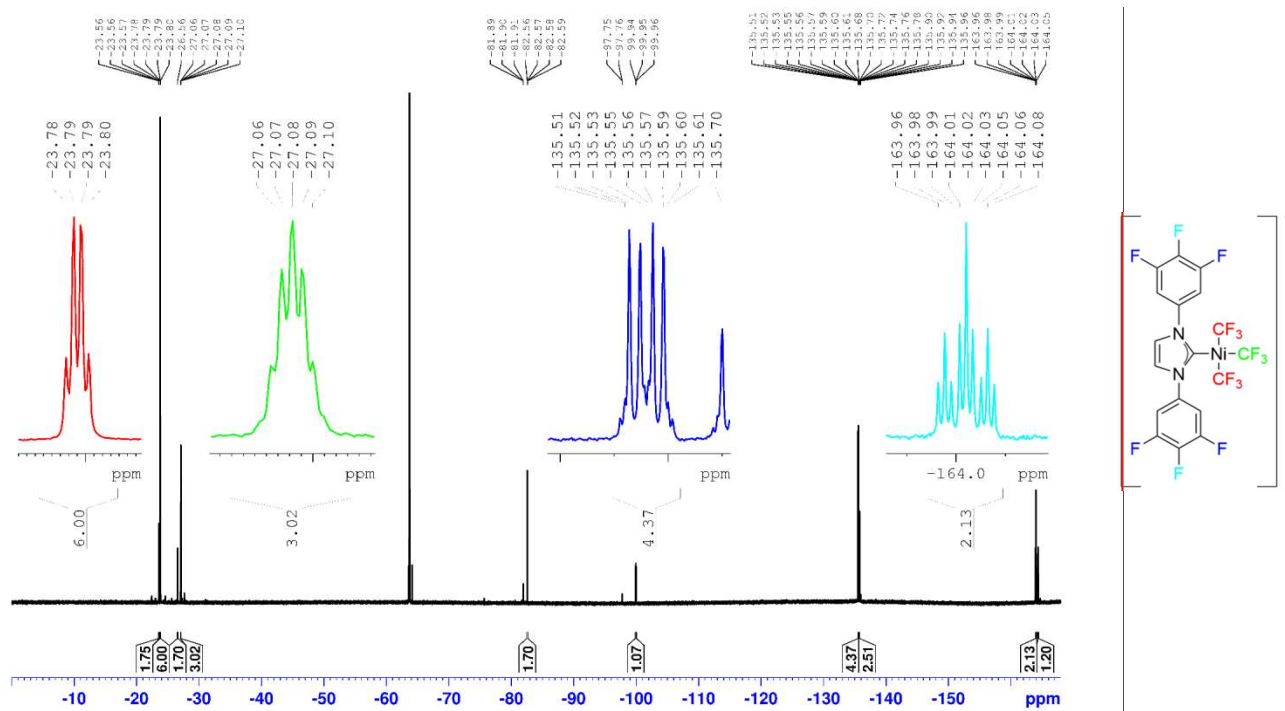

Fig. S23B 400 MHz  $^1\text{H}$  NMR and 470.6 MHz  $^{19}\text{F}$  NMR spectra of **9** and **9'** in  $\text{CD}_3\text{CN}$ .

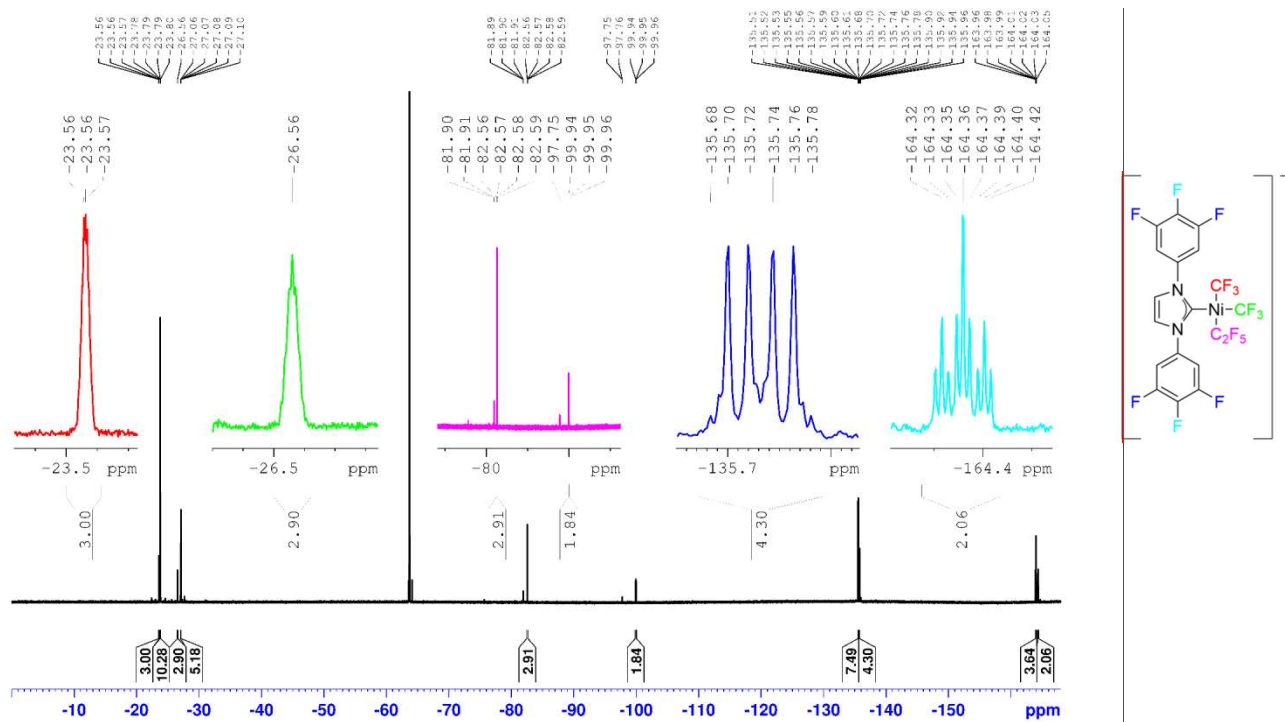

Fig. S23C 400 MHz  $^1\text{H}$  NMR and 470.6 MHz  $^{19}\text{F}$  NMR spectra of **9** and **9'** in  $\text{CD}_3\text{CN}$ .

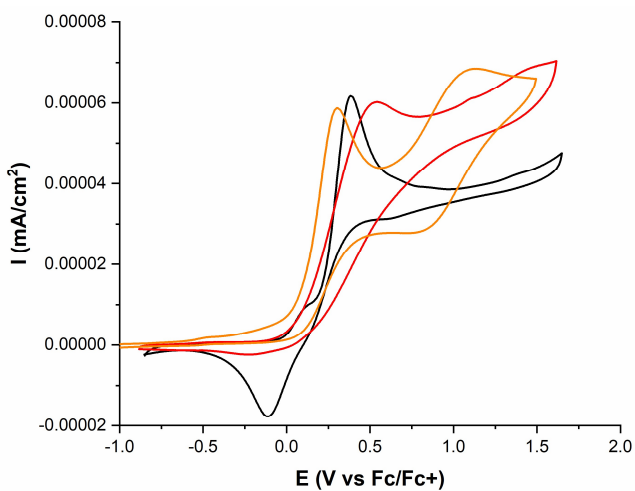

Fig. S24 Cyclic voltammograms of **1** (black), **2** (red), and **4** (orange) in MeCN/*n*-Bu<sub>4</sub>NPF<sub>6</sub>.

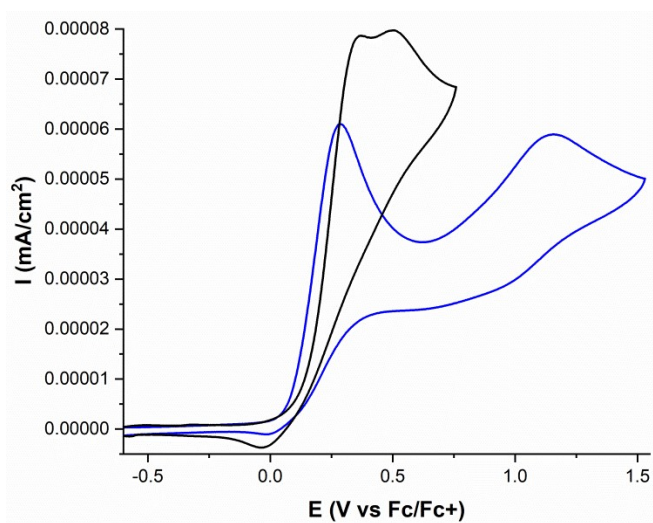

Fig. S25 Cyclic voltammograms of **5** (black) and **6** (blue) in MeCN/*n*-Bu<sub>4</sub>NPF<sub>6</sub>.

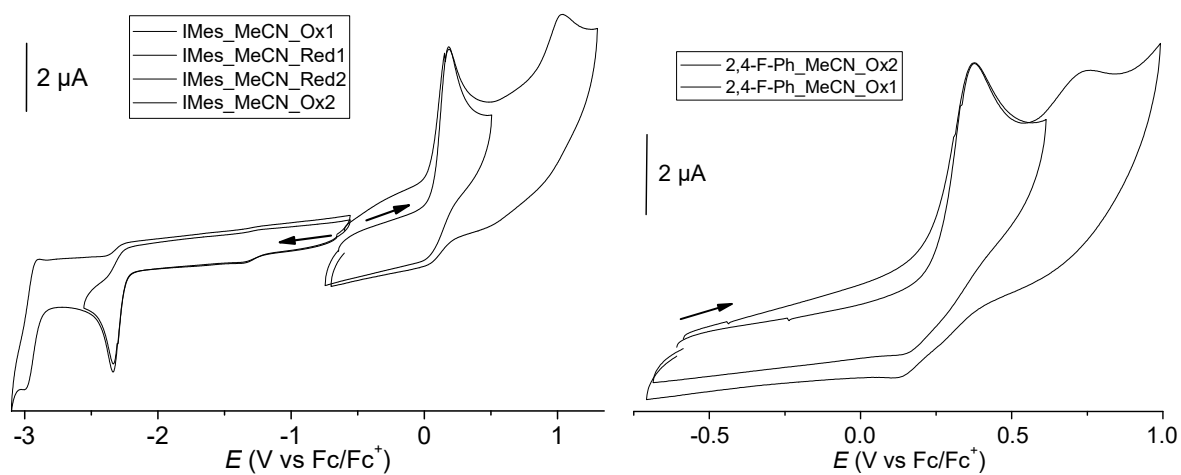

Fig. S26 Cyclic voltammograms of [NEt<sub>4</sub>][(IMes)Ni(CF<sub>3</sub>)<sub>3</sub>] (**6**) (left) and [NEt<sub>4</sub>][(2,4-F<sub>2</sub>Ph-NHC)Ni(CF<sub>3</sub>)<sub>3</sub>] (**7**) (right) in MeCN/*n*-Bu<sub>4</sub>NPF<sub>6</sub>.

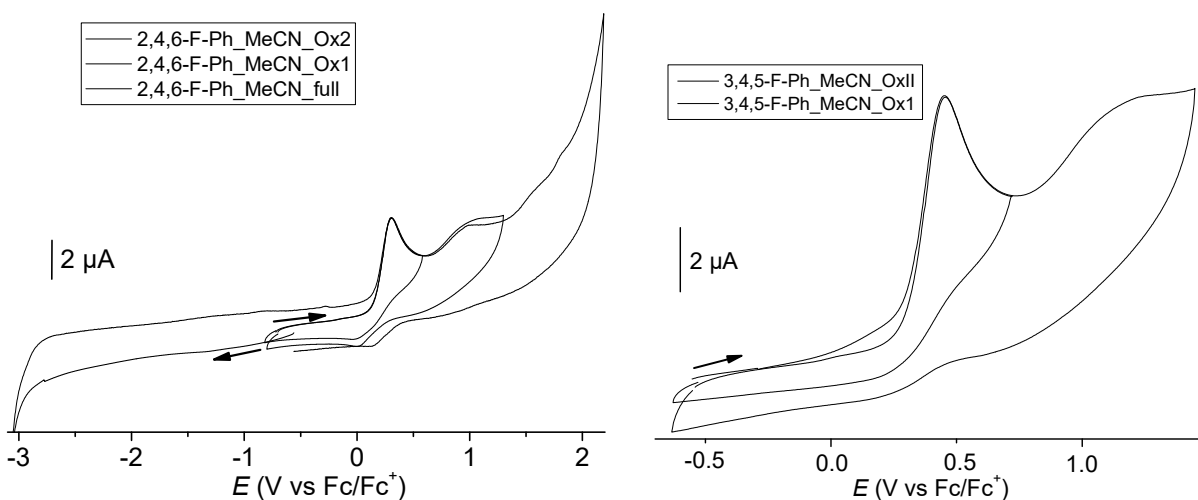

**Fig. S27** Cyclic voltammograms of  $[\text{NEt}_4][(\text{2,4,6-F}_3\text{Ph-NHC})\text{Ni}(\text{CF}_3)_3]$  (**8**) (left) and  $[\text{NEt}_4][(\text{3,4,5-F}_3\text{Ph-NHC})\text{Ni}(\text{CF}_3)_3]$  (**9**) (right) in MeCN/*n*-Bu<sub>4</sub>NPF<sub>6</sub>.

**Table S1.** Selected structure solution and refinement data for nickel complexes

| compound                         | $[\text{PPh}_4][(\text{IMes})\text{Ni}(\text{C}_6\text{F}_5)_3]$ ( <b>6'</b> ) | $[\text{NMe}_4][(\text{2,4-F}_2\text{Ph-NHC})\text{Ni}(\text{CF}_3)_3]$ ( <b>7</b> ) | $[\text{NMe}_4][(\text{3,4,5-F}_3\text{Ph-NHC})\text{Ni}(\text{CF}_3)_3]$ ( <b>9</b> ) | $[\text{NMe}_4][(\text{3,4,5-F}_3\text{Ph-NHC})\text{Ni}(\text{CF}_3)_2(\text{C}_2\text{F}_5)]$ ( <b>9'</b> ) |
|----------------------------------|--------------------------------------------------------------------------------|--------------------------------------------------------------------------------------|----------------------------------------------------------------------------------------|---------------------------------------------------------------------------------------------------------------|
| Formula                          | $\text{C}_{50}\text{H}_{47}\text{F}_9\text{N}_3\text{NiP}$                     | $\text{C}_{22.14}\text{H}_{20}\text{F}_{13.03}\text{N}_3\text{Ni}$                   | $\text{C}_{22}\text{H}_{18}\text{F}_{15}\text{N}_3\text{Ni}$                           | $\text{C}_{31.2}\text{H}_{33.31}\text{F}_{16.92}\text{N}_3\text{NiO}_2$                                       |
| F.W. (g/mol)                     | 950.58                                                                         | 634.48                                                                               | 668.10                                                                                 | 862.57                                                                                                        |
| T (K)                            | 100.0                                                                          | 293(2)                                                                               | 100.0                                                                                  | 100.0                                                                                                         |
| crystal system                   | Monoclinic                                                                     | Triclinic                                                                            | Monoclinic                                                                             | Triclinic                                                                                                     |
| space group                      | <i>C2/c</i>                                                                    | <i>P</i> -1                                                                          | <i>P2</i> <sub>1</sub> / <i>c</i>                                                      | <i>P</i> -1                                                                                                   |
| cell a (Å)                       | 19.9610(11)                                                                    | 9.9583(3)                                                                            | 15.9285(11)                                                                            | 8.5261(3)                                                                                                     |
| b (Å)                            | 11.2347(6)                                                                     | 10.3755(5)                                                                           | 9.6940(6)                                                                              | 13.2144(5)                                                                                                    |
| c (Å)                            | 40.329(2)                                                                      | 12.8434(6)                                                                           | 16.2880(9)                                                                             | 16.9930(6)                                                                                                    |
| α (°)                            | 90                                                                             | 69.438(4)                                                                            | 90                                                                                     | 104.8370(10)                                                                                                  |
| β (°)                            | 97.043(2)                                                                      | 87.104(3)                                                                            | 95.067(2)                                                                              | 91.5500(10)                                                                                                   |
| γ (°)                            | 90                                                                             | 82.992(3)                                                                            | 90                                                                                     | 105.7390(10)                                                                                                  |
| Volume (Å <sup>3</sup> )         | 8975.8(9)                                                                      | 1233.15(10)                                                                          | 2505.2(3)                                                                              | 1771.72(11)                                                                                                   |
| Z                                | 8                                                                              | 2                                                                                    | 4                                                                                      | 2                                                                                                             |
| dens. calc. (g/cm <sup>3</sup> ) | 1.407                                                                          | 1.709                                                                                | 1.771                                                                                  | 1.617                                                                                                         |
| ab. coeff. (cm <sup>-1</sup> )   | 5.42                                                                           | 3.52                                                                                 | 9.05                                                                                   | 6.71                                                                                                          |
| <i>F</i> (000)                   | 3936.0                                                                         | 638.0                                                                                | 1336.0                                                                                 | 876.0                                                                                                         |
| θ range (°)                      | 4.07 to 59.198                                                                 | 2.968 to 63.002                                                                      | 4.894 to 52.836                                                                        | 4.674 to 52.77                                                                                                |
| Index ranges                     | $-27 \leq h \leq 27, -15 \leq k \leq 15, -56 \leq l \leq 55$                   | $-17 \leq h \leq 17, -20 \leq k \leq 20, -26 \leq l \leq 26$                         | $-19 \leq h \leq 19, -12 \leq k \leq 12, -20 \leq l \leq 20$                           | $-10 \leq h \leq 10, -16 \leq k \leq 16, -21 \leq l \leq 21$                                                  |
| Refl. coll.                      | 137625                                                                         | 27658                                                                                | 42484                                                                                  | 78752                                                                                                         |
| Indep. refl.                     | 12599                                                                          | 15287                                                                                | 5140                                                                                   | 7250                                                                                                          |
| Comp. to θ                       | 0.999                                                                          | 0.648                                                                                | 0.998                                                                                  | 0.999                                                                                                         |
| Data/rest./param.                | 12599/24/621                                                                   | 15287/73/461                                                                         | 5140/0/402                                                                             | 7250/207/640                                                                                                  |
| G-o-f on <i>F</i> <sup>2</sup>   | 0.984                                                                          | 0.805                                                                                | 1.044                                                                                  | 1.031                                                                                                         |
| Final R indices                  | $R_1 = 0.0490, wR_2 =$                                                         | $R_1 = 0.0577, wR_2 =$                                                               | $R_1 = 0.0665, wR_2 =$                                                                 | $R_1 = 0.0439, wR_2 = 0.1177$                                                                                 |

|                             |                                                   |                                                   |                                                   |                                                   |
|-----------------------------|---------------------------------------------------|---------------------------------------------------|---------------------------------------------------|---------------------------------------------------|
| [I>2sigma(I)]               | 0.1038                                            | 0.1497                                            | 0.1861                                            |                                                   |
| R indices (all data)        | R <sub>1</sub> = 0.0596, wR <sub>2</sub> = 0.1091 | R <sub>1</sub> = 0.1216, wR <sub>2</sub> = 0.1617 | R <sub>1</sub> = 0.0831, wR <sub>2</sub> = 0.2004 | R <sub>1</sub> = 0.0498, wR <sub>2</sub> = 0.1223 |
| Ext. coeff.                 | None                                              | 0.009832                                          | 0.1109                                            | None                                              |
| Largest diff. peak and hole | 0.49/-0.43                                        | 1.48/-0.83                                        | 1.64/-0.71                                        | 0.97/-0.55                                        |
| CCDC                        | 2095551                                           | 2103215                                           | 2118416                                           | 2126925                                           |

**Table S2** Selected structure solution and refinement data for [PNP]<sub>2</sub>[Ni<sub>2</sub>(CF<sub>3</sub>)<sub>4</sub>(μ-F)<sub>2</sub>]-2THF.

|                                            |                                                                                                              |
|--------------------------------------------|--------------------------------------------------------------------------------------------------------------|
| compound                                   | [PNP] <sub>2</sub> [Ni <sub>2</sub> (CF <sub>3</sub> ) <sub>4</sub> (μ-F) <sub>2</sub> ]-2THF                |
| Formula                                    | C <sub>84</sub> H <sub>76</sub> F <sub>14</sub> N <sub>2</sub> Ni <sub>2</sub> O <sub>2</sub> P <sub>4</sub> |
| formula weight (g/mol)                     | 1652.76                                                                                                      |
| T (K)                                      | 120.0                                                                                                        |
| crystal system                             | Monoclinic                                                                                                   |
| space group                                | P2 <sub>1</sub> /c                                                                                           |
| cell a (Å)                                 | 11.807(2)                                                                                                    |
| b (Å)                                      | 20.672(4)                                                                                                    |
| c (Å)                                      | 15.556(3)                                                                                                    |
| α (°)                                      | 90                                                                                                           |
| β (°)                                      | 94.953(7)                                                                                                    |
| γ (°)                                      | 90                                                                                                           |
| Volume (Å <sup>3</sup> )                   | 3782.6(11)                                                                                                   |
| Z                                          | 2                                                                                                            |
| density calculated (g/cm <sup>3</sup> )    | 1.451                                                                                                        |
| absorption coefficient (cm <sup>-1</sup> ) | 6.67                                                                                                         |
| F(000)                                     | 1704.0                                                                                                       |
| Theta range for data collection (°)        | 3.94 to 52.836                                                                                               |
| Index ranges                               | -14 ≤ h ≤ 14, -25 ≤ k ≤ 25, -18 ≤ l ≤ 19                                                                     |
| Reflections collected                      | 83345                                                                                                        |
| Independent reflections                    | 7749                                                                                                         |
| Completeness to theta                      | 0.997                                                                                                        |
| Data / restraints / parameters             | 7749/0/487                                                                                                   |
| Goodness-of-fit on F <sup>2</sup>          | 1.041                                                                                                        |
| Final R indices [I>2sigma(I)]              | R <sub>1</sub> = 0.0401, wR <sub>2</sub> = 0.0979                                                            |
| R indices (all data)                       | R <sub>1</sub> = 0.0530, wR <sub>2</sub> = 0.1056                                                            |
| Extinction coefficient                     | 0.0511                                                                                                       |
| Largest diff. peak and hole                | 0.69/-0.52                                                                                                   |
| CCDC                                       | 2126925                                                                                                      |
